# Supplementary material for: An operational global L-band soil moisture and vegetation optical depth dataset from optimized 40° SMOS brightness temperatures
Source: Copernicus journal article supplement (doi:10.5194/essd-2025-728), 2026-01-26
Supplement: Supplementary file 1 [file essd-2025-728-supplement.pdf]

# Supplementary

## An operational global L-band soil moisture and vegetation optical depth dataset from optimized 40° SMOS brightness temperatures

Zanpin Xing<sup>1,3,4</sup>, Xiaojun Li<sup>\*2,5</sup>, Frédéric Frappart<sup>2</sup>, Gabrielle De Lannoy<sup>6</sup>, Thomas Jagdhuber<sup>7,8</sup>, Jian Peng<sup>9,10</sup>, Lei Fan<sup>11</sup>, Hongliang Ma<sup>12</sup>, Karthikeyan Lanka<sup>13,14</sup>, Xiangzhuo Liu<sup>2</sup>, Mengjia Wang<sup>2,15</sup>, Lin Zhao<sup>16</sup>, Yongqin Liu<sup>1,3,4</sup>, Jean-Pierre Wigneron<sup>2</sup>

<sup>1</sup>Center for Pan-third Pole Environment, Lanzhou University, Lanzhou, China

<sup>2</sup>INRAE, Bordeaux Sciences Agro, UMR 1391 ISPA, Villenave-d'Ornon, France

<sup>3</sup>Key Laboratory of Pan-third Pole Biogeochemical Cycling, Lanzhou, China

<sup>4</sup>Chayu integrated observation and research station of the Xizang Autonomous Region, Xizang, China

<sup>5</sup>Faculty of Geosciences and Engineering, Southwest Jiaotong University, Chengdu 611756, China

<sup>6</sup>Department of Earth and Environmental Sciences, KU Leuven, Heverlee B-3001, Belgium

<sup>7</sup>German Aerospace Center (DLR) Microwaves and Radar Institute Weßling, Germany

<sup>8</sup>Institute of Geography University of Augsburg (UniA) Augsburg, Germany

<sup>9</sup>Department of Remote Sensing, Helmholtz Centre for Environmental Research - UFZ, Leipzig, Germany

<sup>10</sup>Remote Sensing Centre for Earth System Research-RSC4Earth, Leipzig University, Leipzig, Germany

<sup>11</sup>Chongqing Jinpo Mountain Karst Ecosystem National Observation and Research Station, School of Geographical Sciences, Southwest University, Chongqing, China

<sup>12</sup>INRAE, UMR 1114 EMMAH, UMT CAPTE, Provence-Alpes-Cote d'Azur, F-84000 Avignon, France

<sup>13</sup>Centre of Studies in Resources Engineering, Indian Institute of Technology Bombay, Mumbai, India

<sup>14</sup>Centre for Climate Studies, Indian Institute of Technology Bombay, Mumbai, India

<sup>15</sup>School of Geo-Science and Technology, Zhengzhou University, Zhengzhou 450001, China

<sup>16</sup>School of Geographical Sciences, Nanjing University of Information Science & Technology, Nanjing 210044, China

**Corresponding author:** Xiaojun Li (xiaojunli\_vod@163.com)

1 **Table S1** Summary of the *in-situ* networks from ISMN used in the study. The number of stations/pixels included in each IGBP  
2 land cover is also listed.

| Network name | Country        | No. footprints | IGBP land cover types (No.)                                                                              |
|--------------|----------------|----------------|----------------------------------------------------------------------------------------------------------|
| AMMA-CATCH   | Benin, Niger   | 2              | S (1) and G (1)                                                                                          |
| ARM          | USA            | 15             | G (6) and C (9)                                                                                          |
| FMI          | Finland        | 2              | WS (2)                                                                                                   |
| FR-Aqui      | France         | 1              | ENF (1)                                                                                                  |
| HOAL         | Austria        | 1              | MF (1)                                                                                                   |
| HOBE         | Denmark        | 3              | C (3)                                                                                                    |
| NAQU         | China          | 1              | G (1)                                                                                                    |
| OZNET        | Australia      | 11             | S (2) and C (9)                                                                                          |
| PBO-H2O      | USA            | 1              | G (1)                                                                                                    |
| REMEDHUS     | Spain          | 4              | S (3) and C (1)                                                                                          |
| RISMA        | Canada         | 7              | C (7)                                                                                                    |
| RSMN         | Romania        | 14             | C (12)                                                                                                   |
| SCAN         | USA            | 129            | Diverse land cover types: ENF (3), DBF (10), MF (3), OS (31), WS (3), G (46), C (31) and Barren (2)      |
| SMN-SDR      | China          | 1              | G (1)                                                                                                    |
| SMOSMANIA    | France         | 17             | Diverse land cover types: ENF (2), MF (5), C (9) and CNVM (1)                                            |
| SNOTEL       | USA            | 172            | Diverse land cover types: ENF (63), OS (19), WS (6), G (79) and C (5)                                    |
| SOILSCAPE    | USA            | 4              | Diverse land cover types: OS (2), WS (1) and S (1)                                                       |
|              | Côte d'Ivoire, |                |                                                                                                          |
|              | Nigeria,       |                |                                                                                                          |
| TAHMO        | Ghana,         | 3              | EBF(2) and WS (1)                                                                                        |
|              | Uganda,        |                |                                                                                                          |
|              | Rwanda,        |                |                                                                                                          |
|              | Kenya          |                |                                                                                                          |
| TERENO       | Germany        | 1              | MF (1)                                                                                                   |
| TWENTE       | Netherlands    | 4              | C (4)                                                                                                    |
| TxSON        | USA            | 6              | G (6)                                                                                                    |
| USCRN        | USCRN          | 64             | Diverse land cover types: ENF (4), DBF (6), MF (1), CS(1), OS (8), WS (2), G (38), C (13) and Barren (1) |
| iRON         | Canada         | 1              | ENF (1)                                                                                                  |

3

**Table S2** Statistics of validation results of  $IB\_HR^{SMOSIB}_{mono}$ ,  $IB^{SMOSIB}_{mono}$ ,  $IB^{RawSMOS}_{mono}$ ,  $IC^{SMOS}_{multi}$  and  $IB^{SMAP}_{mono}$  against ISMN *in-situ* SM data for 2016–2022. Best performance in terms of  $R$ ,  $ubRMSD$  and Bias of the five SM retrievals in each network is typed in bold.

| Metrics     | $R$                      |                      |                       |                     |                    | $ubRMSD$ (m <sup>3</sup> /m <sup>3</sup> ) |                      |                       |                     |                    | Bias (m <sup>3</sup> /m <sup>3</sup> ) |                      |                       |                     |                    |
|-------------|--------------------------|----------------------|-----------------------|---------------------|--------------------|--------------------------------------------|----------------------|-----------------------|---------------------|--------------------|----------------------------------------|----------------------|-----------------------|---------------------|--------------------|
| Networks    | $IB\_HR^{SMOSIB}_{mono}$ | $IB^{SMOSIB}_{mono}$ | $IB^{RawSMOS}_{mono}$ | $IC^{SMOS}_{multi}$ | $IB^{SMAP}_{mono}$ | $IB\_HR^{SMOSIB}_{mono}$                   | $IB^{SMOSIB}_{mono}$ | $IB^{RawSMOS}_{mono}$ | $IC^{SMOS}_{multi}$ | $IB^{SMAP}_{mono}$ | $IB\_HR^{SMOSIB}_{mono}$               | $IB^{SMOSIB}_{mono}$ | $IB^{RawSMOS}_{mono}$ | $IC^{SMOS}_{multi}$ | $IB^{SMAP}_{mono}$ |
| AMMA-CATCH  | 0.89                     | <b>0.90</b>          | 0.87                  | 0.88                | 0.90               | <b>0.024</b>                               | 0.025                | 0.030                 | 0.030               | 0.026              | <b>0.000</b>                           | 0.012                | 0.012                 | 0.014               | 0.013              |
| ARM         | 0.85                     | <b>0.85</b>          | 0.84                  | 0.84                | 0.85               | <b>0.043</b>                               | 0.044                | 0.046                 | 0.046               | 0.044              | -0.069                                 | -0.069               | -0.068                | <b>-0.064</b>       | -0.069             |
| FMI         | 0.48                     | 0.46                 | 0.36                  | 0.49                | <b>0.51</b>        | 0.043                                      | 0.041                | 0.053                 | 0.058               | <b>0.038</b>       | <b>0.031</b>                           | 0.060                | 0.128                 | 0.103               | 0.082              |
| FR-Aqui     | 0.82                     | 0.81                 | 0.78                  | 0.77                | <b>0.86</b>        | 0.035                                      | 0.035                | 0.037                 | 0.043               | <b>0.030</b>       | -0.066                                 | -0.047               | -0.063                | -0.032              | <b>-0.024</b>      |
| HOAL        | 0.67                     | 0.64                 | 0.46                  | 0.61                | <b>0.74</b>        | 0.044                                      | 0.046                | 0.054                 | 0.050               | <b>0.040</b>       | -0.182                                 | -0.171               | -0.188                | -0.156              | <b>-0.116</b>      |
| HOBE        | 0.68                     | 0.68                 | 0.63                  | 0.64                | <b>0.73</b>        | <b>0.038</b>                               | 0.039                | 0.051                 | 0.047               | 0.041              | -0.071                                 | -0.070               | -0.065                | <b>-0.063</b>       | -0.066             |
| NAQU        | 0.80                     | 0.80                 | 0.79                  | 0.76                | <b>0.86</b>        | 0.054                                      | 0.057                | 0.054                 | 0.064               | <b>0.053</b>       | 0.057                                  | 0.059                | 0.054                 | 0.066               | <b>0.048</b>       |
| OZNET       | 0.76                     | 0.76                 | 0.75                  | 0.73                | <b>0.76</b>        | <b>0.059</b>                               | 0.060                | 0.065                 | 0.067               | 0.060              | -0.018                                 | -0.008               | -0.007                | <b>-0.004</b>       | -0.009             |
| PBO-H2O     | 0.85                     | 0.85                 | 0.81                  | 0.85                | <b>0.87</b>        | 0.067                                      | 0.067                | 0.068                 | <b>0.062</b>        | 0.063              | -0.081                                 | -0.082               | -0.081                | <b>-0.078</b>       | -0.080             |
| REMEDHUS    | 0.79                     | <b>0.80</b>          | 0.79                  | 0.78                | 0.79               | <b>0.046</b>                               | 0.047                | 0.049                 | 0.051               | 0.047              | -0.033                                 | -0.024               | -0.024                | -0.022              | <b>-0.020</b>      |
| RISMA       | 0.63                     | <b>0.63</b>          | 0.58                  | 0.62                | 0.61               | <b>0.062</b>                               | 0.064                | 0.070                 | 0.074               | 0.068              | -0.096                                 | -0.083               | -0.083                | <b>-0.077</b>       | -0.084             |
| RSMN        | 0.62                     | 0.62                 | 0.53                  | 0.61                | <b>0.62</b>        | 0.060                                      | 0.061                | 0.068                 | 0.072               | <b>0.058</b>       | -0.011                                 | <b>-0.001</b>        | -0.011                | 0.005               | 0.002              |
| SCAN        | 0.67                     | <b>0.67</b>          | 0.64                  | 0.66                | 0.66               | 0.052                                      | <b>0.052</b>         | 0.056                 | 0.057               | 0.053              | -0.049                                 | -0.039               | -0.037                | <b>-0.034</b>       | -0.040             |
| SMN-SDR     | 0.57                     | 0.57                 | <b>0.58</b>           | 0.58                | 0.48               | 0.034                                      | <b>0.035</b>         | 0.039                 | 0.040               | 0.039              | -0.115                                 | -0.114               | -0.110                | -0.110              | <b>-0.097</b>      |
| SMOSMANIA   | <b>0.73</b>              | 0.73                 | 0.67                  | 0.72                | 0.75               | 0.063                                      | 0.061                | 0.062                 | <b>0.058</b>        | 0.057              | -0.104                                 | -0.090               | -0.112                | -0.074              | <b>-0.074</b>      |
| SNOTEL      | <b>0.62</b>              | 0.62                 | 0.56                  | 0.58                | 0.60               | <b>0.075</b>                               | 0.075                | 0.077                 | 0.078               | 0.075              | -0.088                                 | -0.084               | -0.083                | <b>-0.077</b>       | -0.085             |
| SOILSCAPE   | 0.86                     | 0.86                 | 0.84                  | 0.86                | <b>0.87</b>        | <b>0.039</b>                               | 0.041                | 0.054                 | 0.042               | 0.041              | -0.032                                 | -0.019               | <b>-0.010</b>         | -0.016              | -0.014             |
| TAHMO       | 0.67                     | 0.67                 | 0.63                  | 0.63                | <b>0.71</b>        | <b>0.039</b>                               | 0.041                | 0.047                 | 0.046               | 0.040              | -0.039                                 | -0.027               | -0.028                | <b>-0.025</b>       | -0.027             |
| TERENO      | 0.78                     | <b>0.78</b>          | 0.67                  | 0.75                | 0.78               | 0.057                                      | 0.055                | 0.063                 | 0.056               | <b>0.055</b>       | -0.191                                 | -0.169               | -0.167                | <b>-0.162</b>       | -0.169             |
| TWENTE      | 0.75                     | 0.75                 | 0.69                  | 0.73                | <b>0.77</b>        | 0.063                                      | 0.063                | 0.069                 | 0.065               | <b>0.060</b>       | -0.107                                 | -0.099               | -0.096                | <b>-0.094</b>       | -0.095             |
| TxSON       | 0.85                     | 0.85                 | 0.84                  | 0.84                | <b>0.85</b>        | <b>0.033</b>                               | 0.034                | 0.036                 | 0.038               | 0.033              | <b>-0.056</b>                          | -0.060               | -0.063                | -0.057              | -0.059             |
| USCRN       | <b>0.74</b>              | 0.73                 | 0.70                  | 0.71                | 0.73               | 0.049                                      | 0.049                | 0.051                 | 0.051               | <b>0.049</b>       | -0.057                                 | -0.053               | -0.053                | <b>-0.050</b>       | -0.053             |
| iRON        | 0.44                     | <b>0.48</b>          | 0.40                  | 0.38                | 0.48               | 0.051                                      | 0.050                | 0.052                 | 0.052               | <b>0.050</b>       | -0.114                                 | -0.110               | -0.113                | -0.109              | <b>-0.107</b>      |
| Median      | <b>0.67</b>              | 0.67                 | 0.64                  | 0.65                | 0.67               | <b>0.058</b>                               | 0.059                | 0.063                 | 0.063               | 0.059              | -0.067                                 | -0.061               | -0.062                | <b>-0.056</b>       | -0.061             |
| Optimal/All | 3/23                     | 7/23                 | 1/23                  | 0/23                | <b>12/23</b>       | <b>10/23</b>                               | 2/23                 | 0/23                  | 2/23                | 9/23               | 3/23                                   | 1/23                 | 1/23                  | <b>11/23</b>        | 7/23               |

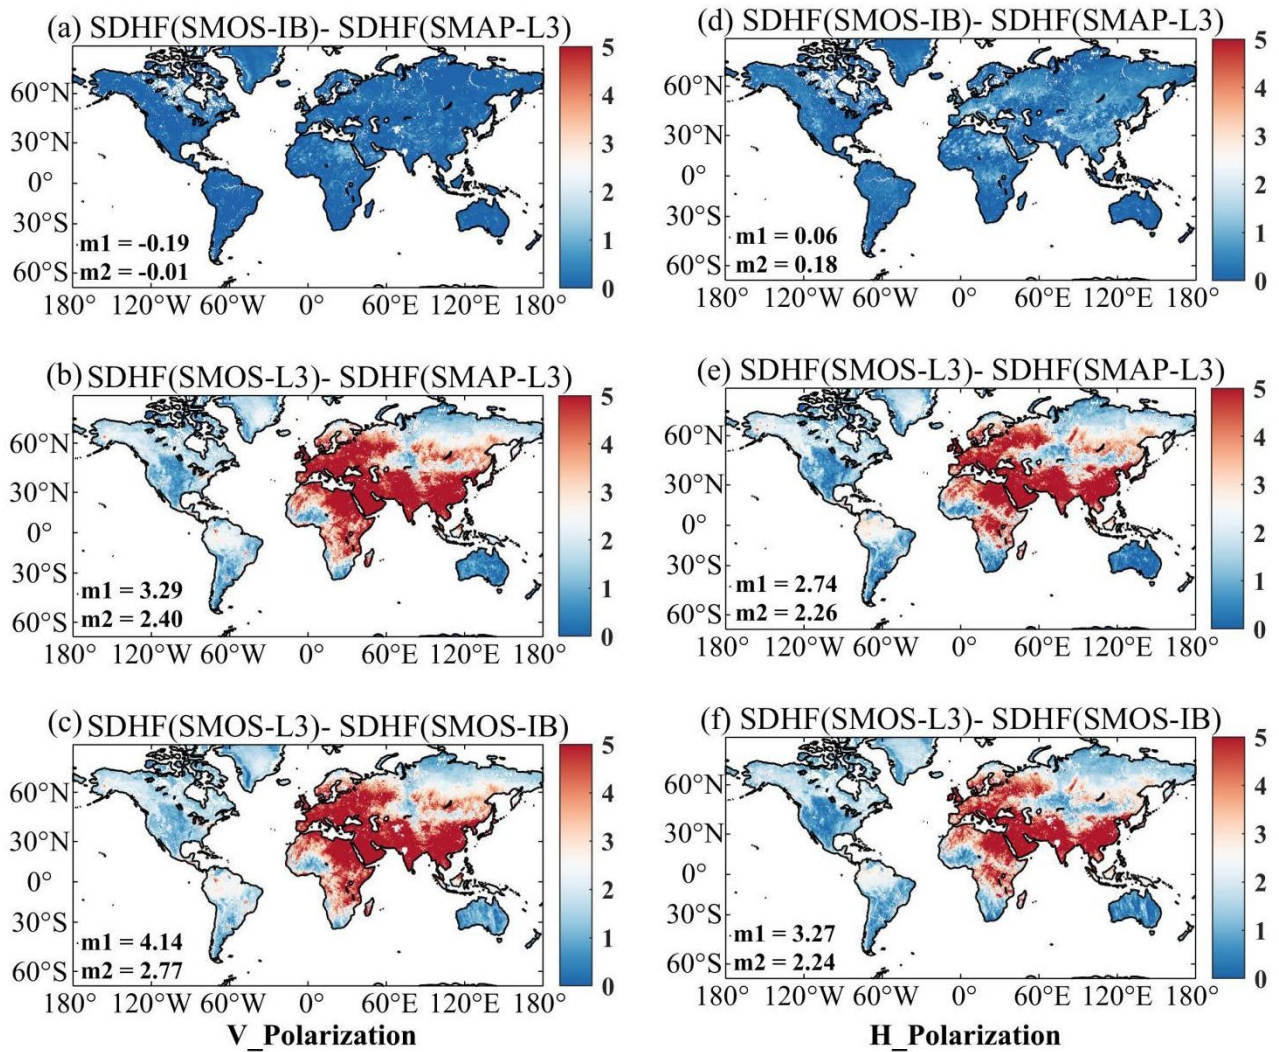

8

9

10

11

12

13

**Figure S1** Maps of the standard deviation of the high-frequency variations (SDHF) difference of the TB time series for each of the three TB products in V-polarization (a) - (c) and H-polarization (d) - (f). The TB SDHF were computed after removing the seasonal trend that was estimated with a 30-days moving window average filter. m1 and m2 denote the spatial mean and median SDHF difference value, respectively.

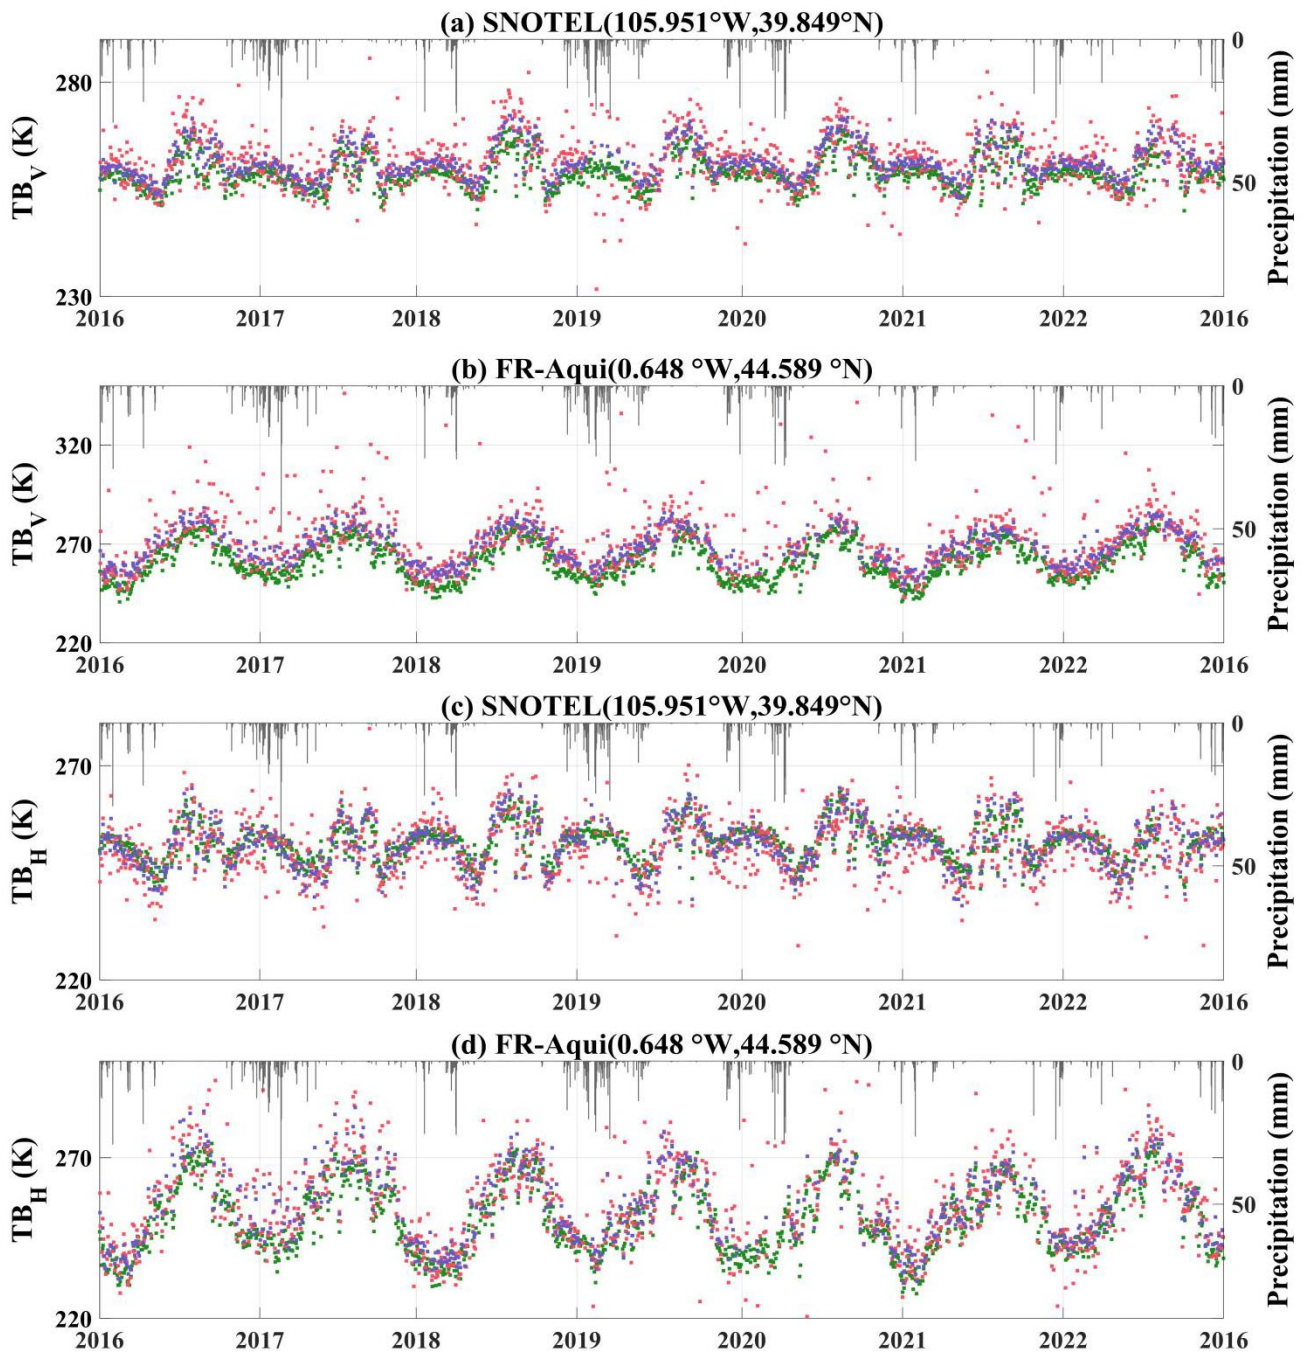

**Figure S2** Time series of the three TB products and *in-situ* measurements between 2016 and 2022 at two sites from (a) SCAN and (b) FR-Aqui network, respectively. Each plot also contains daily precipitation shown in the axis on the right side (grey bar).



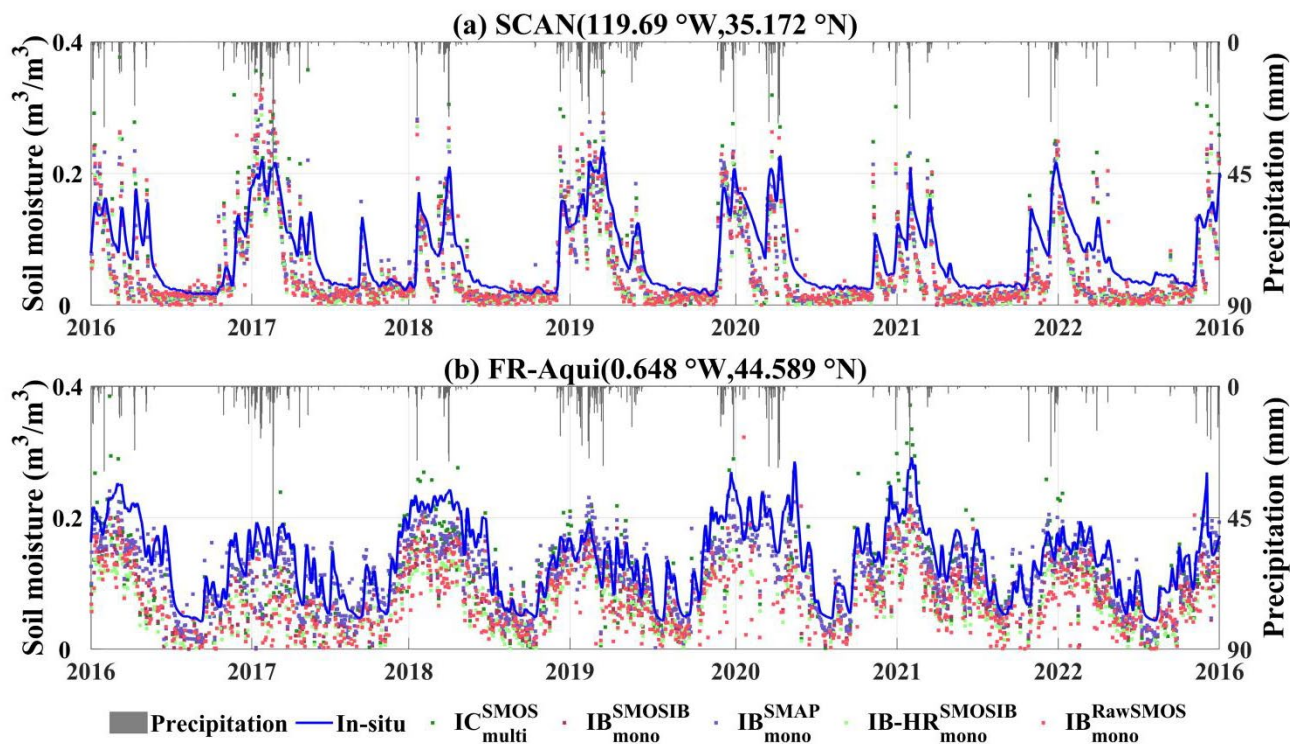

**Figure S3** Time series of the five SM products and *in-situ* measurements between 2016 and 2022 at two sites from (a) SCAN and (b) FR-Aqui network, respectively. Each plot also contains daily precipitation shown in the axis on the right side (grey bar). Note that a 7-day moving window filter was applied to the *in-situ* observations to distinguish them from the satellite-based SM.

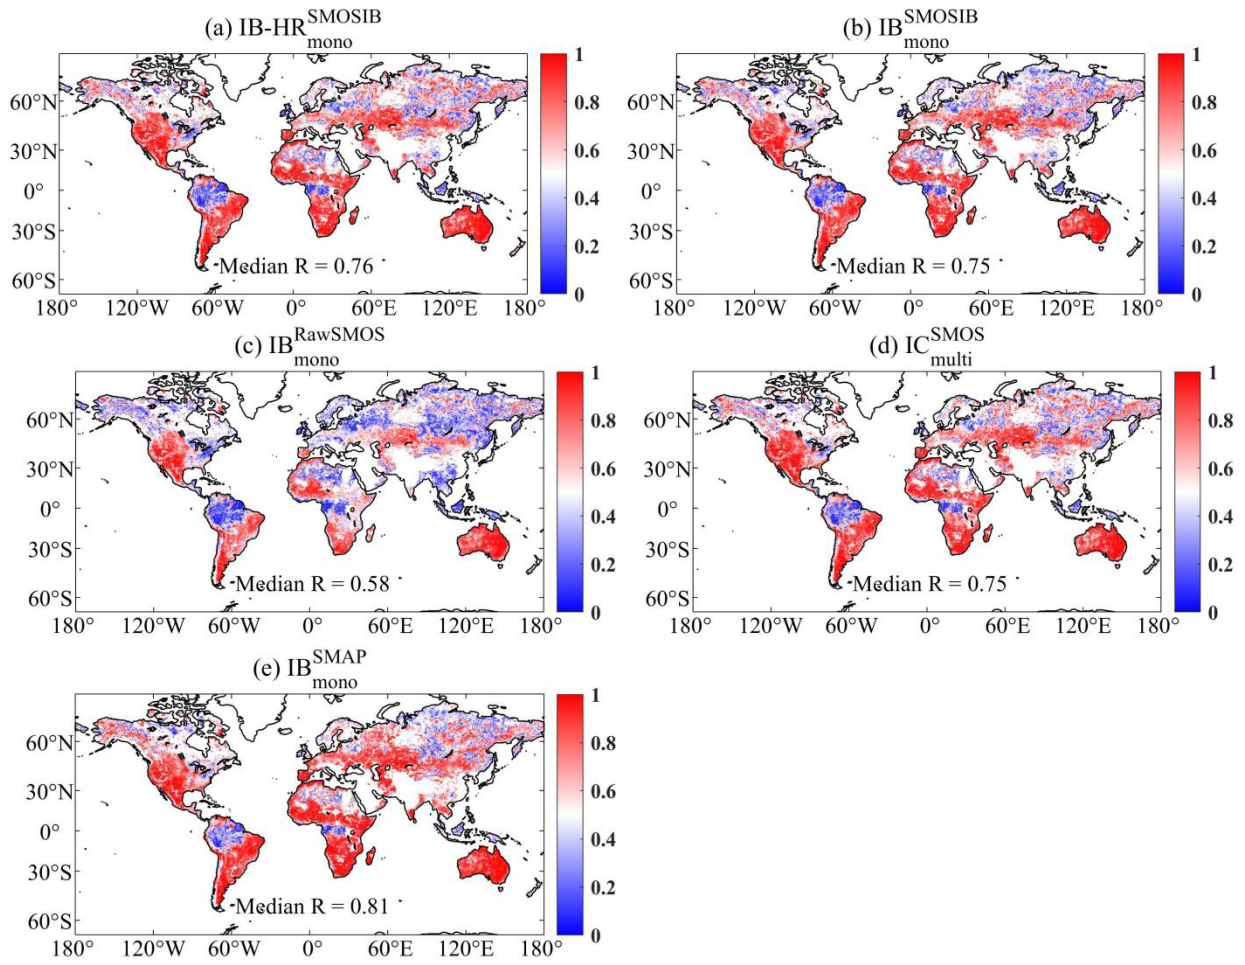

**Figure S4** The spatial distribution of the TCA-based  $R$  calculated by soil moisture anomaly estimates for (a)  $IB-HR^{SMOSIB}_{mono}$ , (b)  $IB^{SMOSIB}_{mono}$ , (c)  $IB^{RawSMOS}_{mono}$ , (d)  $IC^{SMOS}_{multi}$  and (e)  $IB^{SMAP}_{mono}$ .

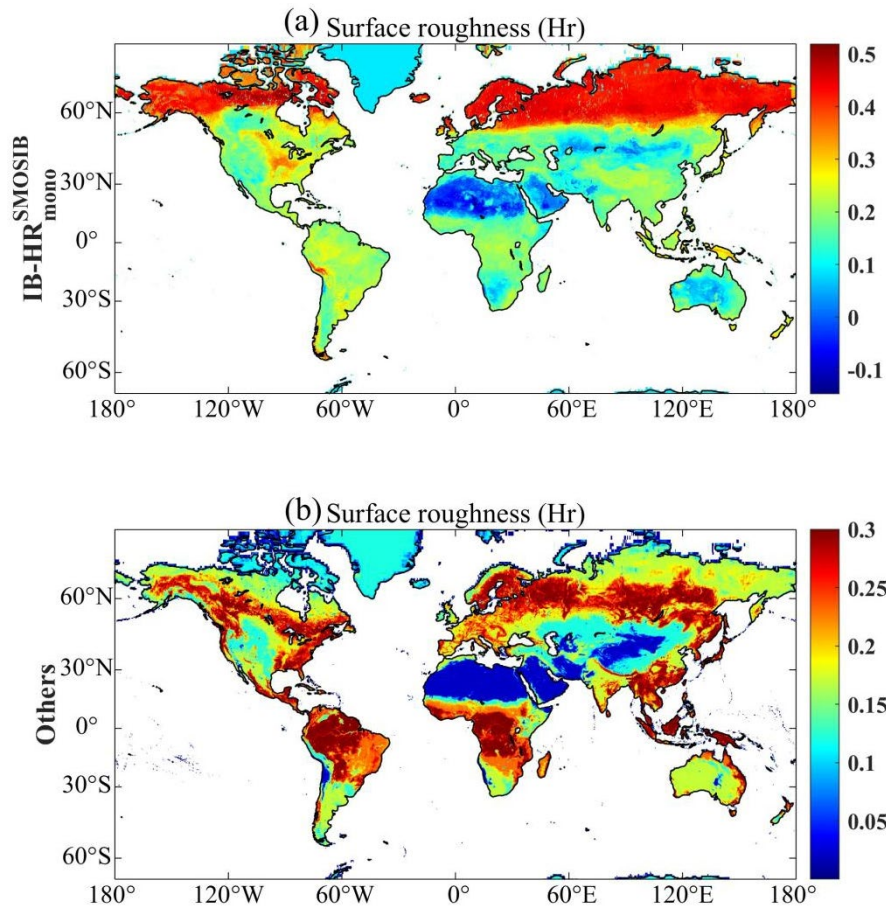

29

30

31

**Figure S5** The spatial distribution of input Hr values for (a)  $IB\_HR^{SMOSIB}_{mono}$  and (b) other products (e.g.,  $IB^{SMOSIB}_{mono}$ ,  $IB^{RawSMOS}_{mono}$ ,  $IC^{SMOS}_{multi}$  and  $IB^{SMAP}_{mono}$ ).



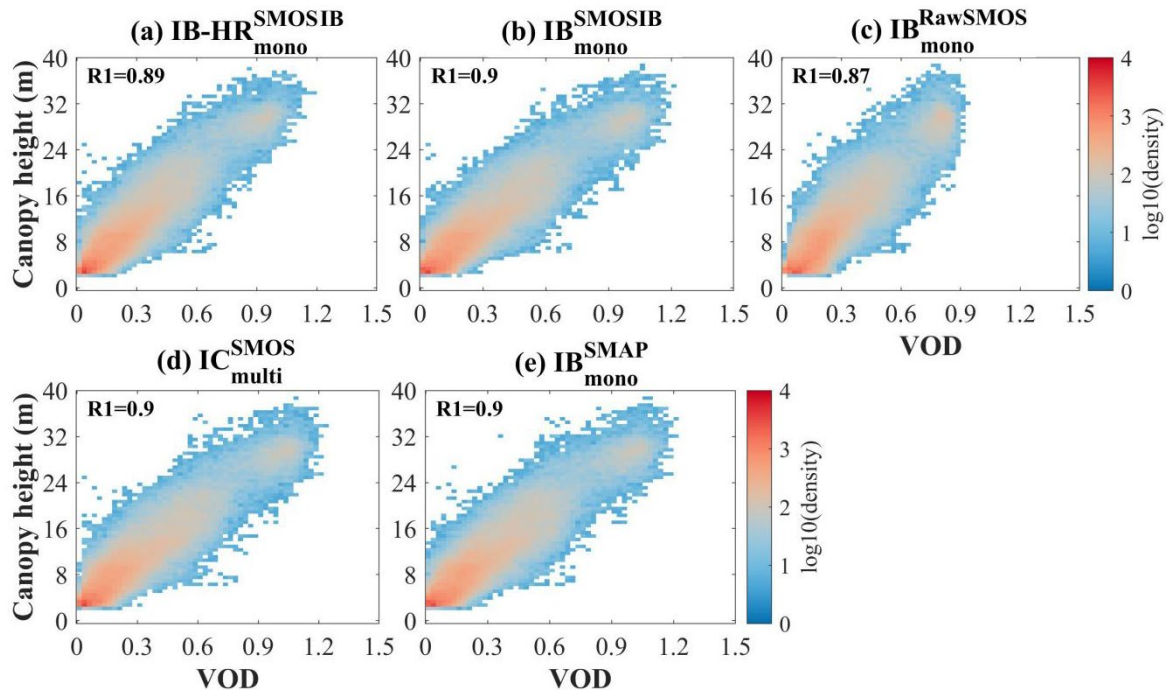

**Figure S6** Global density plots of VOD vs. canopy height (a-e) for five products: (a)  $IB\_HR^{SMOSIB}_{mono}$ , (b)  $IB^{SMOSIB}_{mono}$ , (c)  $IB^{RawSMOS}_{mono}$ , (d)  $IC^{SMOS}_{multi}$  and (e)  $IB^{SMAP}_{mono}$ .  $R1$  denotes the correlation coefficient computed spatially between VOD and corresponding proxies.

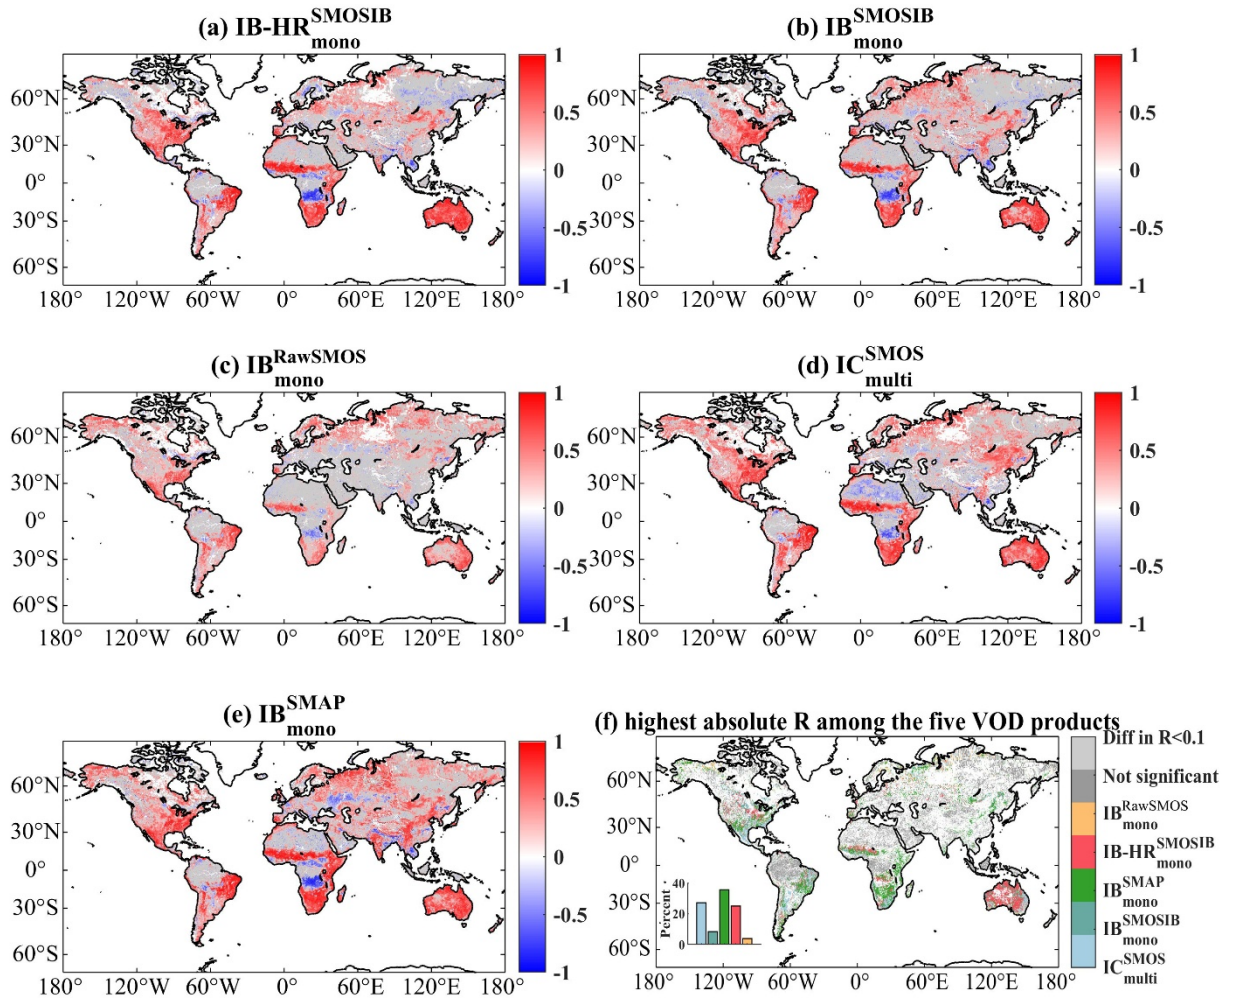

**Figure S7** Correlation coefficient ( $R$ ) of the temporal relationship between 16-day composite of VOD and NDVI (2016 – 2022) for (a)  $IB-HR^{SMOSIB}_{mono}$ , (b)  $IB^{SMOSIB}_{mono}$ , (c)  $IB^{RawSMOS}_{mono}$ , (d)  $IC^{SMOS}_{multi}$  and (e)  $IB^{SMAP}_{mono}$ . (f) maps of the above five VOD datasets with the highest absolute  $R$  values with NDVI. The dark grey color indicates pixels with non-significant ( $p > 0.05$ )  $R$  values, and the light grey color indicates pixels with  $R$  difference for each paired VOD product  $< 0.1$ . White areas mean “no valid data”.

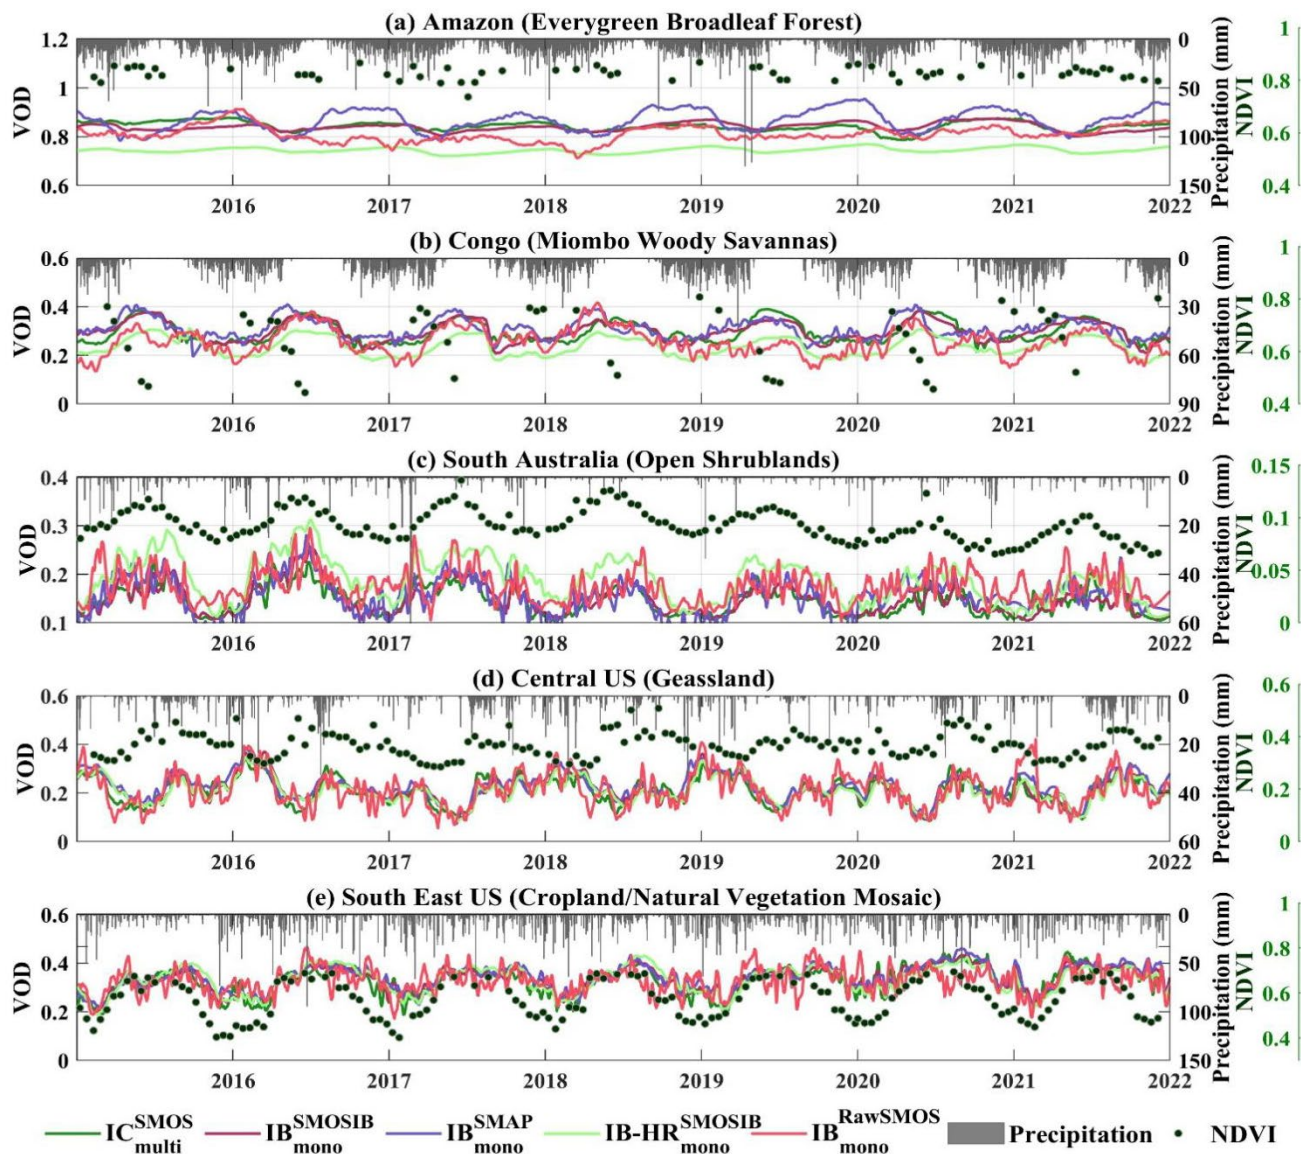

**Figure S8** Time series of the five VOD products over five pixels corresponding to (a) Everygreen broadleaf forest (64.79 °W, 6.65 °S), (b) Miombo woody savannas (23.71 °E, 8.85 °S), (c) Open shrublands (124.54 °E, 30.31 °S), (d) Grasslands (110.39 °W, 34.31 °N) and (e) Cropland/Natural vegetation mosaic (86.83 °W, 35.34 °N) between Jan 2016 and Dec 2022. Each plot also contains daily precipitation and NDVI information. Note that a 7-day moving window filter was applied to the VOD values of the five products to distinguish them from the NDVI values.
